# Supplementary material
Source: HighWire-hosted journal article supplement (https://rmdopen.bmj.com/content/3/2/e000482)
Supplement: inline-supplementary-material-1 [file inline-supplementary-material-1.docx]

**Appendix:**

Table S1: Concordance and agreement between enthesis pain or history of enthesis pain and US abnormalities, per enthesis site.

|  | Structural abnormalities  Number (%) | Absence of structural abnormalities  Number (%) | Concordance  Kappa  PABAK | Power Doppler signal  Number (%) | Absence of power doppler signal  Number (%) | Concordance  Kappa  PABAK |
| --- | --- | --- | --- | --- | --- | --- |
| **Achille** |  |  |  |  |  |  |
| Right pain  - Absence of right pain | 10 (30)  58 (17) | 23 (70)  291 (83) | 79%  0.09  0.58 | 1 (3)  7 (2) | 34 (97)  360 (98) | 90%  0.01  0.80 |
| -Left pain  - Absence of left pain | 13 (43)  53 (15) | 17 (57)  302 (85) | 78%  0.18  0.64 | 4 (13)  5 (1) | 28 (87)  364 (99) | 92%  0.17  0.84 |
| - History of right pain  - Absence of history of right pain | 20 (34)  48 (15) | 38 (66)  276 (85) | 77%  0.18  0.55 | 3 (5)  5 (1) | 60 (95)  334 (99) | 84%  0.05  0.68 |
| - History of left pain  - Absence of history of left pain | 19 (38)  47 (14) | 31 (62)  288 (86) | 74%  0.21  0.59 | 5 (9)  4 (1) | 48 (91)  344 (99) | 87%  013  0.74 |
| **Proximal patellar ligament** |  |  |  |  |  |  |
| Right pain  - Absence of right pain | 4 (22)  41 (11) | 14 (78)  324 (89) | 86%  0.06  0.71 | 1 (6)  6 (2) | 17 (93)  361 (98) | 94%  0.06  0.88 |
| -Left pain  - Absence of left pain | 2 (17)  41 (11) | 10 (83)  330 (89) | 87%  0.02  0.73 | 0 (0)  7 (2) | 13 (100)  365 (98) | 95%  -0.02  0.90 |
| - History of right pain  - Absence of history of right pain | 8 (18)  37 (11) | 37 (82)  301 (89) | 81%  0.07  0.61 | 1 (2)  6 (2) | 44 (98)  334 (98) | 87%  0.01  0.74 |
| - History of left pain  - Absence of history of left pain | 7 (18)  36 (10) | 32 (82)  308 (90) | 81%  0.07  0.64 | 1 (3)  6 (2) | 39 (97)  339 (98) | 88%  0.01  0.77 |
| **Distal patellar ligament** |  |  |  |  |  |  |
| Right pain  - Absence of right pain | 4 (22)  35 (10) | 14 (78)  329 (90) | 87%  0.08  0.74 | 1 (6)  16 (4) | 17 (97)  351 (96) | 91%  0.01  0.83 |
| -Left pain  - Absence of left pain | 2 (17)  38 (10) | 10 (83)  330 (90) | 87%  0.03  0.75 | 3 (23)  13 (3) | 10 (77)  359 (97) | 94%  0.18  0.88 |
| - History of right pain  - Absence of history of right pain | 8 (18)  31 (9) | 36 (82)  307 (91) | 82%  0.09  0.65 | 5 (11)  12 (4) | 40 (89)  328 (96) | 86%  0.10  0.73 |
| - History of left pain  - Absence of history of left pain | 5 (15)  35 (10) | 33 (85)  307 (90) | 82%  0.03  0.64 | 5 (13)  11 (3) | 35 (87)  334 (97) | 88%  0.13  0.76 |
| **Lateral epicondyle** |  |  |  |  |  |  |
| Right pain  - Absence of right pain | 2 (10)  34 (9) | 18 (90)  328 (91) | 86%  0.00  0.73 | 4 (20)  9 (2) | 16 (80)  355 (98) | 92%  0.21  0.87 |
| -Left pain  - Absence of left pain | 2 (12)  31 (8) | 15 (88)  336 (92) | 88%  0.02  0.76 | 4 (24)  10 (3) | 13 (76)  358 (97) | 92%  0.23  0.88 |
| - History of right pain  - Absence of history of right pain | 6 (15)  30 (9) | 33 (85)  313 (91) | 82%  0.07  0.67 | 3 (8)  10 (3) | 35 (92)  336 (97) | 88%  0.06  0.76 |
| - History of left pain  - Absence of history of left pain | 4 (13)  29 (8) | 26 (86)  325 (92) | 85%  0.05  0.71 | 5 (17)  9 (3) | 25 (83)  346 (97) | 91%  0.19  0.82 |

PABAK: Prevalance and Bias Adjusted Kappa
